1 **The Complex Ecosystem in Non Small Cell Lung Cancer**  
2 **Invasion**

3 Seth Haney<sup>1</sup>, Jessica Konen<sup>2,3</sup>, Adam I. Marcus<sup>3,4</sup>, Maxim Bazhenov<sup>1</sup>

4

5 <sup>1</sup>Department of Medicine, Division of Pulmonary, Critical Care & Sleep Medicine, University of  
6 California, San Diego, La Jolla, CA

7 <sup>2</sup>Department of Thoracic/Head and Neck Medical Oncology, The University of Texas MD  
8 Anderson Cancer Center, Houston, Texas, USA.

9 <sup>3</sup>Winship Cancer Institute, Emory University, Atlanta, GA

10 <sup>4</sup>Department of Hematology and Medical Oncology, Emory University, Atlanta, GA

11

12 **Supported by:** R01DC012943 (MB), R01CA194027 (AIM), R21CA201744 (AIM), U54CA209992  
13 (AIM). SH is Postdoctoral Kirschstein-NRSA fellow supported by training award T32HL134632.

14

15

16 **Abstract**

17 Many tumors are characterized by genetic instability, producing an assortment of genetic  
18 variants of tumor cells called subclones. These tumors and their surrounding  
19 environments form complex multi-cellular ecosystems, where subclones compete for  
20 resources and cooperate to perform multiple tasks, including cancer invasion. Our recent  
21 empirical studies revealed existence of such distinct phenotypes of cancer cells, leaders  
22 and followers, in lung cancer. These two cellular subclones exchange a complex array of  
23 extracellular signals demonstrating a symbiotic relationship at the cellular level. Here, we  
24 develop a computational model of the microenvironment of the lung cancer ecosystem to  
25 explore how the interactions between subclones can advance or inhibit invasion. We  
26 found that, due to the complexity of the ecosystem, invasion may have very different  
27 dynamics characterized by the different levels of aggressiveness. By altering the  
28 signaling environment, we could alter the ecological relationship between the cell types  
29 and the overall ecosystem development. Competition between leader and follower cell  
30 populations (defined by the limited amount of resources), positive feedback within the  
31 leader cell population (controlled by the focal adhesion kinase and fibronectin signaling),  
32 and impact of the follower cells to the leaders (represented by yet undetermined  
33 proliferation signal) all had major effects on the outcome of the collective dynamics.  
34 Specifically, our analysis revealed a class of tumors (defined by the strengths of  
35 fibronectin signaling and competition) that are particularly sensitive to manipulations of  
36 the signaling environment. This class can undergo irreversible changes to the tumor  
37 ecosystem that outlast these manipulations of feedbacks and have a profound impact on  
38 invasive potential. Our study predicts a complex division of labor between cancer cell  
39 subclones and suggests new treatment strategies targeting signaling within the tumor  
40 ecosystem.

41

42 **Author Summary**

43 Cancer is an elusive disease due to the wide variety of cancer types and adaptability to  
44 treatment. How is this adaptability accomplished? Loss of genetic stability, a hallmark of  
45 cancer, leads to the emergence of many different types of cancer cells within a tumor.  
46 This creates a complex ecosystem where cancer cell types can cooperate, compete,  
47 and exploit each other. We have previously used an image-guided technology to isolate

48 distinct cancer subclones and identify how they interact. Here, we have employed  
49 mathematical modeling to understand how the dynamic feedbacks between different  
50 cancer cell types can impact the success of invasion in lung cancer. We found that  
51 successful invasion required for feedbacks to support the less viable but more invasive  
52 cell types. These predictions may have implications for novel clinical treatment options  
53 and emphasize the need to visualize and probe cancer as a tumor ecosystem.

54

## 55 Introduction

56 Lung cancer is the second most prevalent type of cancer causing over 150,000 deaths  
57 per year in the United States [1]. Insufficient progress has been made in achieving  
58 efficacious treatments. One of the main barriers in developing new treatment strategies  
59 is the vast diversity between and within cancers; heterogeneity exists between patients  
60 with the same tumor type, between tumor loci within a patient (i.e. metastases and  
61 primary tumor), and within the primary tumor itself [2,3]. Cancer is distinguished by loss  
62 of normal control over cell processes leading to genetic instability and unregulated  
63 growth. Genetic instability creates array of different clonal populations with different cell  
64 fitnesses, renewal and invasion potential [4]. Competition between different cancerous  
65 subclones and between cancerous and normal cell types sets the stage for classical  
66 ecological dynamics in the tumor microenvironment. The outcome of this process  
67 determines success of the tumor progression and its understanding may help discover  
68 novel treatment strategies [5,6].

69 Invasion of surrounding tissue, either locally or distally via metastasis, is a hallmark  
70 of cancer [7]. Extensive research has detailed that invasion is mediated by interactions  
71 between tumor and extracellular matrix [8,9] and cancer-associated fibroblasts [10], but  
72 there is a lack of focus on the cooperative interactions between distinct cancer  
73 subclones. Indeed, in mouse models of lung cancer, collective invasion of cancer cells  
74 was shown to correspond markedly more successful metastasis [3,11–13], confirming  
75 the critical role of collective invasion in driving cancer progression.

76 We recently developed a novel image-guided genomics approach termed SaGA that  
77 allowed us to identify at least two distinct phenotypic cell types in lung cancer invasion  
78 packs: highly migratory *leader cells* and highly proliferative *follower cells* [14]. Genomic  
79 and molecular interrogation of purified leader and follower cultures revealed differential  
80 gene expression prompting distinguishing phenotypes. Specifically, leader cells utilized  
81 focal adhesion kinase signaling to stimulate fibronectin remodeling and invasion. Leader  
82 cells also overexpressed many components of the vascular endothelial growth factor  
83 (VEGF) pathway facilitating recruitment of follower cells but not the leader cell motility  
84 itself [14]. However, leader cells proliferated approximately 70% slower than follower  
85 cells due to a variety of mitotic and doubling rate deficiencies. These deficiencies could  
86 be corrected by addition of cell media extracted from the follower only cell cultures,  
87 leading to conclusion that follower cells produce an unknown extracellular factor



88 responsible for correcting mitotic deficiencies in the leader cells. In sum, leader cells  
89 provide an escape mechanism for followers, while follower cells (and follower cell media  
90 only) help leaders with increased growth. Together, these data support a service-  
91 resource mutualism during collective invasion, where at least two phenotypically distinct  
92 cell types cooperate to promote their escape.

93 In this new study, we developed population-level computational model to explore  
94 impact of the complex interactions between leaders and followers cell types on cancer  
95 progression. The model implemented effects of critical signaling factors controlling the  
96 communication between cell types and the interaction between cells and environment.  
97 We derived analytic boundaries dividing parameter space, representing the major  
98 signaling feedbacks, by the critical changes to invasion dynamics. Our study predicts the  
99 critical role of specific signaling pathways involved in the symbiotic interactions between  
100 cancer subclones for the overall success of cancer progression.

101

## 102 **Methods**

103 Our model tracks the cell counts of leader cells,  $L$ , and follower cells,  $F$ , the  
104 concentrations of extracellular factors VEGF,  $V$ , an unidentified Proliferation factor,  $P$ ,  
105 and Fibronectin,  $N$ , as well as the size of the domains for leader cells,  $\Omega_L$ , and for  
106 follower cells  $\Omega_F$ . Based on the available data [14], the following processes have been  
107 implemented. Leader cells can expand their domain,  $\Omega_L$ , by secreting Fibronectin, which  
108 in turn relaxes competitive pressure on leader cell growth. Leaders also secrete VEGF,  
109 which is taken up by follower cells and causes follower cells to follow them. This was  
110 modeled by increasing the domain for follower cells, which in turn relaxes competitive  
111 pressure on follower cells. Follower cells secrete an unknown proliferation signal that  
112 increases the reproductive capacity of leader cells (initially smaller than follower cells).  
113 Leader and follower cells also must compete with each other for resources at rate  $c$  (see  
114 Figure 1).

115 We modeled cell counts ( $L$  and  $F$  species) as standard Lotka-Volterra competition  
116 [15]. The carrying capacity of the leader cells was dynamic and dependent on the  
117 amount of proliferative signal,  $P$ , present. This capacity increased in a saturating manner  
118 with  $P$ , with maximum equal to the follower cell carrying capacity,  $K_{F0}$ . Intra- and inter-  
119 specific competition was driven by concentration, i.e.  $[L]=L/\Omega_L$ , and birthrate was driven  
120 by absolute number,  $L$ . The extracellular species ( $V, P, N$ ) and domain sizes all had linear  
121 dynamics for simplicity. Below primes denote the time derivative of the variable.

$$122 \quad \frac{L'}{L} = r_L \left[ 1 - \frac{(L/\Omega_L) + c(F/\Omega_F)}{K_{L0} + (K_F - K_{L0}) \left( \frac{P}{\delta + P} \right)} \right] \quad (1)$$

$$123 \quad \frac{F'}{F} = r_F \left[ 1 - \frac{(F/\Omega_F) + c(L/\Omega_L)}{K_F} \right] \quad (2)$$

$$124 \quad V' = \beta_V L - \gamma_V V \quad (3)$$

$$125 \quad P' = \beta_P F - \gamma_P P \quad (4)$$

$$126 \quad N' = \beta_N L - \gamma_N N \quad (5)$$

$$127 \quad \Omega_L' = \beta_{OL} N - \gamma_{OL} (\Omega_L - \Omega_{L0}) \quad (6)$$

$$128 \quad \Omega_F' = \beta_{OF}V - \gamma_{OF}(\Omega_F - \Omega_{F0}) \quad (7)$$

129 Here  $r_L$  and  $r_F$  denote the rate of expansion for leaders and followers, respectively. The  
 130 parameter  $c$  denotes the strength of competition between the two cell types. The  
 131 capacity of the environment for follower cells is given by the parameter  $K_F$ . The capacity  
 132 for leaders depended on an initial capacity,  $K_{L0}$ , and on the amount of proliferation signal  
 133 in a Hill-like manner with EC50,  $\delta$ . Each extra-cellular species ( $V, P, N$ ) had a production  
 134 rate,  $\beta$ , and a degradation rate  $\gamma$ , the domain size variables ( $\Omega_L$  and  $\Omega_F$ ) also had a  
 135 parameter denoting initial capacity ( $\Omega_{L0}$  and  $\Omega_{F0}$ ).

136

### 137 *Reduction and Feedbacks*

138 Previous 3D spheroid experiments show that invasion occurs on a much faster time  
 139 scale than reproduction [14]. By assuming that factors ( $V, P, N$ ) and domains ( $\Omega_L, \Omega_F$ )  
 140 change much faster than cell counts, one can reduce these equations to a set of two  
 141 equations ( $L, F$ ), where variables in equations (3)-(7) are at their equilibria

$$142 \quad V_{SS} = \frac{\beta_V}{\gamma_V}L; \quad P_{SS} = \frac{\beta_P}{\gamma_P}F; \quad N_{SS} = \frac{\beta_N}{\gamma_N}L; \quad \Omega_L^{SS} = \frac{\beta_{OL}}{\gamma_{OL}}N; \quad \Omega_F^{SS} = \frac{\beta_{OF}}{\gamma_{OF}}V; \quad (8)$$

143 Using this reduction drastically reduced the complexity of the system. First, we defined  
 144 the feedbacks based on the reduced system. The feedback that determines the leaders  
 145 impact on their own domain expansion was denoted by  $s_L = \frac{\beta_N \beta_{OL}}{\gamma_N \gamma_{OL}}$ , for the strength of the  
 146 leader only feedback. The feedback that determines the leaders impact on follower cell  
 147 growth was denoted by  $s_{LF} = \frac{\beta_V \beta_{OF}}{\gamma_V \gamma_{OF}}$ , for the strength of the leader to follower feedback.  
 148 The feedback that determines the followers impact on leader cell growth was denoted by  
 149  $s_{FL} = \frac{\beta_P}{\gamma_P \delta}$ , for the strength of the follower to leader feedback. Second, using these  
 150 assumptions, we re-wrote the leader-follower system as

$$151 \quad \frac{L'}{L} = r_L \left[ 1 - \frac{(L/\Omega_L^{SS}(L)) + c(F/\Omega_F^{SS}(L))}{K_L(F)} \right] \quad (9)$$

$$152 \quad \frac{F'}{F} = r_L \left[ 1 - \frac{(F/\Omega_F^{SS}(L)) + c(L/\Omega_L^{SS}(L))}{K_F} \right] \quad (10)$$

153 where

$$154 \quad \Omega_L^{SS}(L) = s_L L + \Omega_{L0}; \quad \Omega_F^{SS}(L) = s_{LF} L + \Omega_{F0}; \quad K_L(F) = K_{L0} + (K_F - K_{L0}) \frac{s_{FL} F}{1 + s_{FL} F}.$$

155 Using this reduction we can derive several critical points in invasion. The reduced  
 156 system (9),(10) may have five equilibrium points: extinction of leaders ( $O_1: L=0, F>0$ ),  
 157 followers ( $O_2: L>0, F=0$ ), both ( $O_3: L=0, F=0$ ), and two coexistence points ( $O_4, O_5$ )  
 158 (where both leaders and followers populations are non-zero:  $L>0, F>0$ ;  $O_4$  is always  
 159 stable, whereas  $O_5$  is unstable). Changes in the feedback strengths cause fundamental  
 160 shifts in dynamics. In the following we used parameter values  $\Omega_L = 1, \Omega_F = 1$ . To match  
 161 experimental observations that leader cells grow slower and less efficiently, we set  
 162  $r_L = 0.3$  and  $K_{L0} = 0.3$  while  $r_F = 1$  and  $K_F = 1$ . The strengths of the various  
 163 feedbacks,  $s_L, s_{LF}$ , and  $s_{FL}$  are varied systematically below.

164

### 165 *Transcritical Bifurcation at Zero*

166 To determine the critical points in the leader-follower system, we calculated the Jacobian  
 167 of the reduced system evaluated for the leader extinction equilibrium ( $O_1 : L = 0, F =$   
 168  $F_{LE} = \Omega_F \cdot K_F$ ).

$$169 \quad J|_{L=0; F=F_{LE}} = \begin{pmatrix} r_L \left(1 - \frac{c K_F}{K_L^{SS}}\right) & 0 \\ r_F \left(\frac{K_{F0} s_{FL}}{\Omega_{F0}^2} - \frac{c}{\Omega_{L0}}\right) & -r_F \end{pmatrix} \quad (11)$$

170

171 Here  $K_L^{SS} = K_{L0} + (K_F - K_{L0}) \frac{s_{FL} \cdot F_{LE}}{1 + s_{FL} \cdot F_{LE}}$ , the value of  $K_L$  when  $F = F_{LE}$ . The Jacobian has  
 172 eigenvalues

$$173 \quad \lambda = \left[ r_L \left(1 - c \frac{K_F}{K_L^{SS}}\right), -r_F \right] \quad (12)$$

174 For  $c < \frac{K_L^{SS}}{K_F}$ ,  $O_1$  is unstable and  $O_4$  (steady state where both  $L>0$  and  $F>0$ ) is stable. At  
 175  $c = \frac{K_L^{SS}}{K_F}$  these two equilibria coincide, and for  $c > \frac{K_L^{SS}}{K_F}$  equilibrium  $O_4$  moves to the left of  
 176 the  $L=0$  axis and becomes unstable while  $O_1$  gains stability. Thus, extinction of leaders  
 177 ( $O_1$ ) is stable as long as  $c > \frac{K_L^{SS}}{K_F}$ , which determines an upper bound on competition

178 where leader and followers can coexist and a bifurcation we call the transcritical  
179 bifurcation at zero.

180

### 181 *Saddle Node Bifurcation*

182 The system undergoes a saddle node bifurcation when two coexistence equilibria ( $O_4$   
183 and  $O_5$ ), representing non-zero populations of both leaders and followers, coincide and  
184 disappear. Beyond this bifurcation point the leader/follower populations undergo  
185 unbounded growth. This bifurcation was determined numerically using MatCont [16]. We  
186 found that this bifurcation point depends critically on both the leader feedback strength,  
187  $s_L$ , and on the competition strength,  $c$ . One of these coexistence points is effected by the  
188 transcritical bifurcation, below.

189

### 190 *Transcritical Bifurcation at Infinity*

191 When the leader feedback strength is sufficiently high relative to competition, leaders  
192 and followers may undergo unbounded growth from the initial conditions belonging to the  
193 certain regions of the phase space. We describe this scenario as an attractor basin in  
194 the phase space for the stable infinity attractor. However, if  $s_L$  is reduced (or  $c$  is  
195 increased) beyond a certain threshold, infinity becomes unstable. This corresponds  
196 precisely with the loss of an unstable coexistence equilibrium with non-zero values of  
197 both leaders and followers ( $O_5$ ). Leaders and followers that are coexisting must satisfy

$$198 \quad \frac{L}{\Omega_L} + c \frac{F}{\Omega_F} = K_L(F) \quad (13)$$

199 and  $\frac{F}{\Omega_F} + c \frac{L}{\Omega_L} = K_F$  or equivalently,

$$200 \quad \frac{F}{\Omega_F} = K_F - c \frac{L}{\Omega_L}. \quad (14)$$

201 In the case that follower populations are large relative to  $\delta$ ,  $K_L(F) \rightarrow K_F$ , we substituted  
202 (13) into (14) to find

$$203 \quad L = \frac{K_F \Omega_{L0}}{(1+c) \left(1 - \frac{K_F s_L}{1+c}\right)} \quad (15)$$

204 which has a discontinuity at

$$205 \quad c = K_F s_L - 1 \quad (16)$$

206 defining the loss of one of the coexistence equilibrium points ( $O_5$ ) when it moves to  
207 infinity. We describe this as the transcritical bifurcation at infinity as the stability of infinity  
208 changes at this point.

## 209 **Results**

### 210 *Leader and Follower Ecosystem*

211 Leader and follower cell types in non-small cell lung cancer spheroids were previously  
212 isolated using a fluorescence technique termed SaGA [14] (Figure 1A,B). We found that  
213 leaders and followers are genotypically and phenotypically distinct populations of cancer  
214 cells that exchange a variety of signaling molecules to coordinate complex behavior  
215 during invasion. In this new work, we focus on four main channels of communication  
216 (see Figure 1C). Leader cells secrete fibronectin in an autocrine manner. This leads to  
217 ECM restructuring and expansion of leader cell domain,  $\Omega_L$ , (see Methods) which  
218 ultimately increases the leader cell count. The strength of this positive feedback is  
219 characterized in our model by  $s_L$  (strength of Leader only feedback). Leader cells also  
220 secrete VEGF. In the leader-follower ecosystem this promotes follower cells to track  
221 expanding leader cells, increases follower domain size ( $\Omega_F$ ), and ultimately, follower cell  
222 count. In our model, the strength of this feedback is given by  $s_{LF}$  (strength of Leader to  
223 Follower feedback). Follower cells secrete an undetermined proliferation signal, as  
224 evidenced by the observation that follower-only cell media increases leader cell growth  
225 rate [14]. The strength of this feedback is given by  $s_{FL}$  (strength of Follower to Lead  
226 feedback) in the model. Finally, both cell types compete for resources, which is modeled  
227 here by the feedback  $c$ .

228 These feedback mechanisms were incorporated into a modified Lotka-Volterra  
229 type competition-cooperation model. We chose a Lotka-Volterra model to focus on the  
230 ecological aspects of competition in the cancer ecosystem. Here, the leader cells could  
231 grow to a total capacity  $K_L$ , which is an increasing function of the proliferation signal  
232 secreted by the follower cells. This capacity was reached when a combination of leader  
233 and follower cell densities (cell counts divided by domains) exceeds  $K_L$  (see Methods).  
234 Increases in the domain size of each type (by Fibronectin secretion in the leader case  
235 and VEGF in the follower case) limited the overall density of that cell type and mitigated  
236 its impact on the overall capacity of the system. Increasing competition, for example by  
237 limiting resources, increased the impact of either cell type on the conjugate capacity type  
238 (e.g. how leader density,  $L/\Omega_L$ , impacts follower capacity  $K_F$ ).

239 This system of the feedbacks between the leader and follower cells describes a  
240 complex dynamical ecosystem. The impact these feedbacks may have on cancer growth

241 or invasion is unclear. Leader and follower cells are engaged in competition for  
242 resources but can also be engaged in cooperation and play supportive roles. For  
243 example, invasive leader cells provide new territory for the follower cell population and  
244 are supported by proliferative follower cells. In the following, we analyzed the model to  
245 find critical turning points for the ecosystem dynamics.

246

### 247 *Multiple Types of Invasion Dynamics*

248 We found that multiple feedbacks between the leader and follower cell populations could  
249 produce a wide variety of complex dynamics. When competition strength,  $c$ , was high  
250 and the strength of the leader only feedback,  $s_L$ , was moderate, population dynamic was  
251 bounded and resulted in a stable cell count for both leader and follower cell populations  
252 as well as a stable domain size (Fig. 2A). In contrast, when feedback was large and  
253 competition was moderate, population dynamics revealed an unbounded growth (Fig.  
254 2B). Intermediate values of both  $c$  and  $s_L$  led to dynamic regimes that depended on the  
255 initial cell count: ecosystems with large initial cell count underwent unbounded growth,  
256 while small ecosystems attained a stable size (Figure 2C). These types of dynamics are  
257 in a qualitative agreement with experimental studies which revealed (a) rapid expansion  
258 of intact leader-follower ecosystem and (b) that blocking specific feedback mechanisms  
259 in vitro can reduce or block cell population growth. Specifically, blockade of fibronectin  
260 signaling or blockade of VEGF signaling led to significantly reduced invasion [14].

261 This array of behaviors can be explained by the critical shifts in the cell  
262 population dynamics due to the changes in the feedbacks strength. We found that  
263 depending on the level of competition,  $c$ , and the strength of invasiveness of leaders,  $s_L$ ,  
264 the leader-follower ecosystem can operate in one of five different regimes, as described  
265 below (Figure 3).

266 **Leader Extinction:** When competition was high and invasive feedback was minimal, the  
267 leader cells (the weaker competitor) were forced to extinction while the follower cells  
268 persisted and its population reached a stable size (Figure 3A,B). There was a critical  
269 level of competition between leaders and followers, given by  $c > \frac{K_L^{SS}}{K_F}$  (see Methods,  
270 *Transcritical bifurcation at zero* for derivation), required for this type of dynamics. This  
271 critical level of competition, the ratio of the capacity of leader cells,  $K_L^{SS}$ , to that of the



272 follower cells,  $K_F$ , essentially depends on the fitness differences between leader only  
273 and follower only cell populations. Leader and follower populations with similar fitness  
274 would tolerate a much higher competition threshold without driving one species to  
275 extinction. From the dynamical systems perspective, when  $c > \frac{K_L^{SS}}{K_F}$  and  $s_L$  is sufficiently  
276 low (see below), the only stable equilibrium in the phase space is  $O_1$  and all system  
277 trajectories converge to this equilibrium point representing the leader cells extinction  
278 state (Figure 3B).

279 **Leader Extinction with Escape:** If competition was above the leader extinction  
280 limit,  $c > \frac{K_L^{SS}}{K_{F0}}$ , but not high enough to balance the impact of the leader only feedback,  
281  $c < K_F s_L - 1$ , there were two possible outcomes depending on the initial population size  
282 (see Methods, *Transcritical Bifurcation at Infinity* for derivation) (Figure 3A,C). The  
283 second condition,  $c < K_F s_L - 1$ , can be interpreted as a balance between positive  
284 feedback,  $s_L$ , and negative feedback,  $c$ . In this regime, leaders could go extinct if the  
285 initial population of leader cells was sufficiently small. Alternatively, if initial populations  
286 of leaders and followers both were large enough, the ecosystem could grow  
287 unboundedly. Thus, our model predicts, that the ability to undergo successful collective  
288 invasion depends on whether the initial bulk size is larger than a critical amount. These  
289 types of dynamics with divergent outcomes occur when competition is large enough to  
290 be able to drive leaders extinct, but small enough so it can be outbalanced by the strong  
291 invasive effects of the leader cells.

292 In the phase space of the model, the basins of attraction of the two distinct  
293 dynamical regimes are separated by a critical boundary (separatrix of a saddle  
294 equilibrium  $O_5$ ) where the cell bulk size determines its ultimate fate (Figure 3C). Both  
295 infinity and the leader extinction equilibrium ( $O_1$ ) are stable attractors representing two  
296 possible end solutions of the system dynamics.

297 **Non-invasive Dynamics:** When competition was smaller than the extinction limit,  
298  $c < \frac{K_L^{SS}}{K_{F0}}$ , but large enough to balance leader feedback strength,  $c > K_F s_L - 1$ , the  
299 ecosystem size remained bounded and both leaders and followers attained a stable and  
300 non-zero population size. In the phase space, this type of dynamics corresponds to  
301 conversion to the stable equilibrium  $O_4$  (Figure 3A,D). We refer to this as non-invasive  
302 dynamics, as the cells cannot grow beyond a defined size. In this case, while

303 competition was present, it was too weak to lead to extinction, while leader population  
304 was not invasive enough to promote unlimited growth. This scenario represents stable,  
305 non-invasive dynamics.

306 **Multimodal Dynamics:** If competition was (a) small enough to allow leader existence,  
307  $c < \frac{K_L^{SS}}{K_{F0}}$ , (b) small enough relative to the leader feedback strength, so that escape was  
308 possible,  $c < K_{FSL} - 1$ , but (c) high enough, so that for small initial population of leader it  
309 could balance the positive leader feedback, leader and follower cell dynamics depended  
310 on the initial population size (Figure 3A,E). Ecosystems with a large initial cell count  
311 would grow without bound but those with a small initial cell count would reach a stable  
312 population size, due to the competition as in the non-invasive dynamics case. On the  
313 phase plane the last outcome was represented by a contraction to a stable equilibrium  
314  $O_4$ . This critical boundary was defined by a separatrix of a saddle fixed point  $O_5$  (Fig. 3E).  
315 (This separatrix was determined numerically by reversing time [17].)

316 **Aggressive Dynamics:** When leader invasive strength was sufficiently high and  
317 competition was sufficiently low, the only possible outcome was unbounded growth of  
318 both cell populations (Figure 3A, F). In this case, the only stable attractor in the phase  
319 space is infinity where all system trajectories are converged to.

320 In summary, our analysis revealed that the complex balance of the feedbacks in  
321 the leader-follower ecosystem can lead to the multiple types of population dynamics.  
322 When the leaders' invasiveness was low, the outcome depended on the competition  
323 between two populations – strong enough competition promoted leader extinction, while  
324 weak competition allowed stable coexistence states with bounded size of both leader  
325 and follower cell populations. As leader invasiveness rate increased, the system  
326 revealed a new state with unbounded growth. This aggressive dynamic state coexisted  
327 with a stable attractor representing a bounded size of both populations if competition  
328 between leaders and followers was strong enough. Otherwise, unlimited population  
329 growth was the only outcome. Based on the system dynamics derived above, next we  
330 will show how critical boundaries between parameter regimes could be exploited to lead  
331 to profound changes in the ecosystem dynamics.

332

333 *Limiting leader feedback Leads to Irreversible Changes in Invasion*

334 In the multimodal dynamics (e.g., Fig. 3C or 3E), leader and follower cell populations can  
335 undergo explosive growth or achieve a stable count depending on the initial size of the  
336 ecosystem. We examined the impact of limiting the invasive leader feedback in  
337 scenarios of this type (Fig. 4). Even when the ecosystem was initially sufficiently large to  
338 support unbounded growth, after reducing invasive leader feedback  $s_L$  (Fig. 4A), the  
339 ecosystem was forced into the non-invasive dynamics type and the total bulk of the cell  
340 population reduced reaching a steady-state (Fig. 4E). Importantly, the leader and  
341 follower cell populations remained stable and bounded after restoring invasive leader  
342 feedback to its original strength (Fig 4E, right side).

343 From the point of view of the dynamical systems analysis, reducing leader  
344 feedback changed the phase space, so the only stable attractor was non-zero  
345 equilibrium ( $O_4$ ) (Fig. 4C). In this regime, unlimited growth was abandoned and the  
346 system converged to the equilibrium state ( $O_4$ ) corresponding to the bounded size of  
347 both cell populations. This equilibrium remained stable even after the feedback was  
348 restored to its original level (Fig. 4D).

349 Our model predictions (Fig. 5A) are consistent with in vitro data (Fig. 5B). Using  
350 siRNA blocking we previously showed that expression of fibronectin (which is  
351 characterized by the strength of leader only feedback,  $s_L$ , in the model) led to the low  
352 invasion potential and a stable cell population size [14].

353

#### 354 *Increasing Competitive Signals Leads to Leader Extinction*

355 We next tested effect of increasing competition between leader and follower cell  
356 populations on the ecosystem dynamics (Fig. 6). Leader cells excrete extracellular  
357 factors that induce the death of the followers and leaders alike [14], which supports  
358 competition. Here, we again started from aggressive unbounded type of dynamics and  
359 then increased competition strength (Fig. 6A). This caused change of the ecosystem  
360 dynamics. Both cell populations reduced the size, with leader cell population going to  
361 extinction state (Fig. 6E). However, upon restoring competition to the original level,  
362 leader and follower cells reemerge and grow unboundedly again. The last can be  
363 avoided if no leader cells remain (complete extinction).

364 Again, this dynamic can be easily understood using bifurcation analysis. Increasing  
365 competition strength made leader extinction equilibrium state  $O_1$  stable (Fig. 6C).  
366 However, when competition was restored to its original level,  $O_1$  became unstable again  
367 and leader and follower cells returned to escape dynamics (Fig. 6D). Importantly, in the  
368 extreme case of very small cell populations, cells undergo discrete and stochastic  
369 dynamics and complete extinction of a small population of leaders is possible in a finite  
370 time, leading to irreversible changes due to competition increase (similar dynamics was  
371 described in our previous study [18]).

372

### 373 *Support For Leaders has Large Impact on Aggressiveness*

374 Changing the strength of the feedbacks that determine the interaction between  
375 leaders and followers ( $s_{LF}$  and  $s_{FL}$ ) could also impact the dynamics. Leader cells secrete  
376 VEGF (denoted here by  $s_{LF}$ ) that helps follower cells to expand their territory and follower  
377 cells secrete a proliferation signal (denoted here by  $s_{FL}$ ) that allows leaders to increase  
378 their proliferative capacity. These two feedbacks have distinct impacts on the overall  
379 ecosystem dynamics. Perturbations to  $s_{LF}$  (changing the impact that leaders have on  
380 followers) changed the system dynamics (assuming that the cell count was small  
381 enough at the time of the intervention) from unlimited growth to the bounded type. The  
382 size of both leader and follower cell populations decreased reaching non-zero steady-  
383 state (Fig. 7E). This regime persisted as long as the feedback from the leaders to  
384 followers remained low. However, increasing  $s_{LF}$  to its original level restored the system  
385 dynamics with unlimited cell population growth (Fig. 7E, right size).

386 Using bifurcation analysis, we found that reducing impact that leaders have on  
387 followers shifted the location of the saddle node bifurcation boundary that separated  
388 state with unlimited growth only dynamics and a state with coexistence of the unlimited  
389 growth and a stable equilibrium attractor ( $O_4$ ) regimes (Fig. 7A). Effectively, decreasing  
390  $s_{LF}$  increased the threshold level of the invasive leader feedback ( $s_L$ ) needed to cause  
391 unbounded growth. Thus, reducing  $s_{LF}$  made the system to converge to the stable  
392 equilibrium state  $O_4$  corresponding to the bounded size of both cell populations (Fig. 7C).  
393 However, increasing  $s_{LF}$  to its original level changed the phase space again, so infinity  
394 became the only stable attractor (Fig. 7D) and unlimited growth dynamics resumed.

395 Our model predictions (Fig. 5C) are consistent with in vitro data (Fig. 5D). Using  
396 siRNA to block the VEGF receptor VEGFR2 (siKDR in Fig. 5D), we previously showed  
397 that blocking the leader to follower feedback led to the limited invasion potential and  
398 stable cell population size (Fig. 5D) [14].

399 Finally, we tested the role of the follower to leader feedback ( $s_{FL}$ ) and found that  
400 perturbations to  $s_{FL}$  have a significant impact on the system dynamics. In contrast to  $s_{LF}$ ,  
401 changes to the  $s_{FL}$  changed both the location of the saddle node bifurcation boundary  
402 and the transcritical bifurcation boundary of the leader extinction (Fig. 8A). Therefore,  
403 decreasing  $s_{FL}$  both increased the threshold on the leader invasion strength ( $s_L$ ) needed  
404 to cause unbounded population growth and decreased the threshold of the competition  
405 strength ( $c$ ) needed to induce leader population extinction. We have exploited this to  
406 show that decreasing  $s_{FL}$  can cause irreversible change in the cell population bulk. Again,  
407 starting with unlimited growth dynamics (Fig. 8B), decreasing follower to leader feedback,  
408  $s_{LF}$ , reversed the dynamics and both leader and follower cell population reduced in size  
409 converging to the steady-state (Fig. 8E). This regime with bounded ecosystem size  
410 persisted after the feedback was restored (Fig. 8E, right side).

411 Using dynamical systems analysis, we found that reducing follower to leader  
412 feedback ( $s_{FL}$ ) triggered the system convergence to the stable attractor ( $O_1$ ) representing  
413 the leader extinction state (Fig. 8C). When the feedback was restored,  $O_1$  becomes  
414 unstable but the ecosystem fell to the attraction basin of the stable equilibrium  $O_4$  and  
415 avoided regime of unlimited growth (Fig. 8D). In more general case, the outcome  
416 depended on the balance between the leader to follower,  $s_{FL}$ , and follower to leader,  $s_{LF}$ ,  
417 feedbacks, with higher  $s_{LF}$  requiring more significant  $s_{FL}$  decrease to avoid unbounded  
418 growth (Fig. 8F).

419

#### 420 *Summary of Perturbations to Cancer Ecosystem*

421 Complex balance of the feedbacks within the cancer cell ecosystem allows for some  
422 alterations of the feedback parameters to have significant impacts on the ecosystem  
423 dynamics. We summarized these different possibilities in Table 1 from the perspective of  
424 achieving the goal to reduce cell population bulk. Hence, manipulating  $s_L$ ,  $s_{LF}$ ,  $s_{FL}$  should  
425 be interpreted as decreasing these feedbacks, whereas manipulating  $c$  should be  
426 interpreted as increasing  $c$ . We also examined the possibility of non-targeted cell death,

427 such as might occur during non-specific chemotherapy. Manipulations were either  
428 irreversible, so the system dynamics remained altered upon cessation of the  
429 perturbation (e.g. irreversible leader extinction or irreversible stabilization of the cell  
430 count), or caused only temporal and reversible reduction of the cell bulk. In some cases,  
431 such as leader extinction with escape and multimodal dynamics (see Fig. 3), the size of  
432 the initial cell bulk dictated possible outcomes of the feedback perturbations. The  
433 outcomes described in the Table 1 represent the best-case scenario. Thus,  
434 perturbations were started from an appropriate initial state and maintained long enough  
435 to achieve the desired effect.

436 This analysis revealed that certain parameter regimes are more sensitive to the  
437 perturbations than others. Specifically, in the leader extinction with escape regime (area  
438 (2) in Figure 3A) and the multimodal dynamics regime (area (4) in Figure 3A)  
439 perturbations could have irreversible impacts on the ecosystem. In these cases, any  
440 perturbation (death, reduction in  $s_L$ ,  $s_{LF}$ ,  $s_{FL}$ , or increase in  $c$ ) can potentially force the  
441 system to cross the critical boundary (separatrix) and transition from explosive growth to  
442 a steady-state dynamic. These regimes give a unique opportunity to impact the  
443 invasiveness of the ecosystem.

444 Also, certain perturbations could force the ecosystem into a state where leader  
445 extinction ( $O_1$ ) is stable. This occurs when applying sufficient increases in the  
446 competition pressure,  $c$ , or decreases in the support from followers to leaders,  $s_{LF}$ . In  
447 these cases, it is possible for the discrete and stochastic nature of the cell population  
448 dynamics to define the ecosystem fate. Thus, a sufficiently long perturbation could  
449 irreversibly eradicate a sufficiently small discrete number of leader cells [18].

450

451

| Type of dynamics               | Initial State                                      | Manipulation Type                                                                      | Outcome                                                                     |
|--------------------------------|----------------------------------------------------|----------------------------------------------------------------------------------------|-----------------------------------------------------------------------------|
| 1. Leader Extinction           | N/A                                                | death, $c$ , $s_L$ , $s_{LF}$ , $s_{FL}$                                               | Reversible cell bulk reduction.                                             |
| 2. Leader Extinction w/ Escape | Infinity attractor basin<br>Stable attractor basin | death, $s_L$ , $c$ , $s_{LF}$ , $s_{FL}$<br>death, $c$ , $s_L$ , $s_{LF}$ , $s_{FL}$   | Irreversible leader extinction.<br>Reversible cell bulk reduction.          |
| 3. Non-invasive Dynamics       | N/A                                                | $c$ , $s_{FL}$ , $s_L$ , $s_{LF}$ , death                                              | Reversible cell bulk reduction.                                             |
| 4. Multimodal                  | Infinity attractor basin<br>Stable attractor basin | $c$ , $s_{FL}$ , $s_L$ , $s_{LF}$ , death<br>$c$ , $s_{FL}$ , $s_L$ , $s_{LF}$ , death | Irreversible stabilization of cell bulk.<br>Reversible cell bulk reduction. |
| 5. Aggressive Dynamics         | N/A                                                | $c$ , $s_{FL}$ , $s_L$ , $s_{LF}$ , death                                              | Reversible cell bulk reduction.                                             |

452 **Table 1: Effect of the different feedback alterations on the ecosystem dynamics.**

453 First column - the different types of the ecosystem dynamics in the ( $s_L$ ,  $c$ ) parameter  
 454 space are as shown in Figure 3. In some cases, initial population size dictated the  
 455 outcome. These outcomes are distinguished in the initial state given in the 2d column.  
 456 An initial state in the infinity attractor basin denotes that the cell bulk exceeded the  
 457 critical amount and could grow unboundedly; initial state in the stable attractor basin  
 458 denotes the case when the cell counts were less than the critical value and the system  
 459 converged to the stable attractor. Third column - each transient manipulation to the  
 460 model parameters had a goal to reduce cell population size (decrease of  $s_L$ ,  $s_{LF}$ ,  $s_{FL}$  or  
 461 increase of  $c$ ). The “death” indicates a non-targeted “enforced” reduction of the cell  
 462 population. The last column indicates the system dynamics after the original values of  
 463 the model parameters were restored. The changes were either irreversible upon  
 464 cessation of the perturbation (e.g. irreversible leader extinction and irreversible  
 465 stabilization of cell bulk) or caused reversible reduction in the cell population bulk.

466



467

## 468 **Discussion**

469 Heterogeneity of tumors, at the genetic, epigenetic, and phenotypic levels, is one  
470 of the main obstacles to developing new effective treatment strategies. Tumor cells  
471 rapidly evolve forming highly efficient symbiotic systems with well-defined labor division  
472 targeted to augment tumor survival and expansion. In lung cancer collective invasion  
473 packs observed *in vitro*, two distinct populations of cancer cells - highly migratory *leader*  
474 *cells* and highly proliferative *follower cells* – have been recently identified [14]. In this  
475 new study, we used computational models to explore collective dynamics of the leader-  
476 follower ecosystem and to exploit approaches that can effectively disrupt it.

477 We found that competition between two populations (defined by the limited  
478 amount of resources), the positive feedback within the leader cell population (controlled  
479 by the focal adhesion kinase and fibronectin signaling) and impact of the follower cells to  
480 the leaders (represented by yet undetermined proliferation signal) all had major effects  
481 on the outcome of the collective dynamics. While increase of the positive feedback  
482 within the leader cell population would ultimately lead to the system state with  
483 unbounded growth, manipulating follower to leader feedback or increasing competition  
484 between leader and follower cell populations was able to reverse this dynamic and to  
485 form a stable configuration of the leader and follower cell populations.

486 Our model highlights the importance of focal adhesion kinase (FAK) and  
487 fibronectin signaling. Our previous empirical work showed that FAK signaling was a key  
488 distinguishing feature between leader and follower cells and critical for invasive leader  
489 behavior [14]. Our model predicts that FAK is the main driver of invasion by leader cells  
490 and disruptions in the FAK driven feedback loop cause critical changes in the leader-  
491 follower population dynamics. Indeed, FAK is a well-known regulator of the tumor micro-  
492 environment: promoting cell motility and invasion [19]. FAK expression is upregulated in  
493 ovarian [20] and breast cancer [21] tumors with expression levels correlating with  
494 survival [22,23]. Many FAK inhibitors, such as defactinib, are currently in clinical trials  
495 with promising results [19,24,24–28]. A key advantage of FAK inhibitors is that they  
496 impact both the tumor itself and the surrounding stroma where tumor associated  
497 fibroblasts also utilize FAK signaling to promote tumor invasiveness [29,30].



498 While commonly associated with angiogenesis in healthy and cancerous tissue,  
499 our previous work showed that VEGF mediates communication between leader and  
500 follower cells [14]. There is a long history of targeting VEGF to limit tumor invasiveness  
501 [31,32]. While great success has been seen in preclinical models [33,34], only moderate  
502 success was seen in clinical trials with anti-VEGF drugs such as bevacizumab [35,36].  
503 This is largely due to cancers developing resistance to specific VEGF-therapeutics. In  
504 our model, VEGF stimulated followers to shadow leaders and expand their domain.  
505 However, we found that inhibition of VEGF had little impact on the ecosystem dynamics  
506 relative to the perturbations of the other axes (such as FAK or competition for resources).

507 Competition for resources is one of the principal forces that structures any  
508 ecosystem, including tumor ecosystems [6,37]. Our modeling work predicts that  
509 competition was a critical component in the leader-follower ecosystem. We found that  
510 when the strength of competition exceeded a critical threshold, leaders (the weaker  
511 competitor) were driven to extinction. Further, enhancements of the competition in the  
512 model changed the fundamental cell population dynamics. In some cases this meant  
513 stopping unbounded growth and promoting the extinction of the leader cells. Our  
514 previous in vitro work demonstrated that leaders may inhibit the growth of followers  
515 through an unknown secreted factor in cell media [14]. While still in the early stages,  
516 exploiting this inhibition may also provide similar benefits to those shown here as  
517 increases in competition.

518 Our previous study also revealed a currently unknown extracellular factor  
519 secreted by followers that corrects mitotic deficiencies and enhances leader proliferation  
520 [14]. Our modeling highlights this factor as having critical impact on the ecosystem  
521 dynamics. We found that blockade of this proliferation factor, modeled here by the  
522 strength of the followed to leader feedback, can cause critical shifts in the population  
523 dynamics. More work needs to be done to identify and understand the mechanism of this  
524 action, but preliminary results suggests that this may be a potential novel treatment axis  
525 that specifically targets the mutualistic interaction between leaders and followers.

526 Ecological forces shape the exchange of biomaterial between different biotic and  
527 abiotic environmental agents. These forces determine capacity of the ecosystem for  
528 different species (subclones) and the environment ultimately sets the fitness of each of  
529 the competitors. Classic ecological theory dictates that an abundance of many similar

530 species (such as similar subclonal populations) will lead to a high competition for  
531 resources [38,39]. This competition can force the exclusion of inferior competitors and  
532 ultimately may reduce heterogeneity of the system. However, when symbiotic and  
533 mutualistic interactions occur, otherwise competitive species support each other and  
534 increase the capacity of the ecosystem [40,41]. Symbiosis between different subclonal  
535 populations may be particularly important during critical times when the tumor survival is  
536 in peril (such as hypoxia, metastasis or therapy). One critical moment in tumor  
537 progression occurs when highly proliferative tumor cells saturate the resource potential  
538 of their current environment. In order to obtain more resources, tumors need to invade  
539 new territory.

540 Previous results to model complex tumor cell population dynamics range from  
541 detailed cellular level models (e.g. [9,42–44]) to continuous models with a different  
542 degree of complexity (e.g. [18,45–48]) similar to that proposed in our new study. While  
543 cellular level model can directly incorporate heterogeneous cell types and intrinsic tumor  
544 properties, including proliferation, metabolism, migration, protease and basement  
545 membrane protein expression, and cell-cell adhesion, they typically have high-  
546 dimensional variables and parameter space that is difficult to explore. Advantages of the  
547 reduced type of models include the low dimensional parameter space, where  
548 parameters have clear biophysical meanings, and which allows for systematic analysis  
549 to rapidly explore and determine the sensitive parameter space. We previously applied  
550 this approach to study cell interactions in chronic cancers and predicted conditions for  
551 explosive tumor growth [18]. Similar approach was applied to model cancer cell  
552 population dynamics in many other types of cancer [45,48,49].

553 The vast diversity between different cancers and even between different cell  
554 types within a single tumor remains one of the biggest hurdles to overcome to achieve  
555 personalized cancer treatment. This diversity leads to a complex array of interactions  
556 between different tumor cell types and the healthy surrounding tissue: the tumor  
557 ecosystem. Our work has isolated phenotypically unique lung cancer cells and taken a  
558 dynamical approach to understanding the interactions within the tumor ecosystem. We  
559 identified the critical features and interactions composing the leader-follower ecosystem,  
560 to explore vulnerabilities of the lung cancer invasive cell populations.

561

- 562 1. American Cancer Society. Cancer Facts & Figures 2016.
- 563 2. Burrell RA, McGranahan N, Bartek J, Swanton C. The causes and  
564 consequences of genetic heterogeneity in cancer evolution. *Nature*.  
565 2013;501: 338–345. doi:10.1038/nature12625
- 566 3. Gerlinger M, Swanton C. How Darwinian models inform therapeutic failure  
567 initiated by clonal heterogeneity in cancer medicine. *Br J Cancer*. 2010;103:  
568 1139–1143. doi:10.1038/sj.bjc.6605912
- 569 4. Greaves M, Maley CC. Clonal evolution in cancer. *Nature*. 2012;481: 306–  
570 313. doi:10.1038/nature10762
- 571 5. Korolev KS, Xavier JB, Gore J. Turning ecology and evolution against  
572 cancer. *Nat Rev Cancer*. 2014;14: 371–380. doi:10.1038/nrc3712
- 573 6. Pienta KJ, McGregor N, Axelrod R, Axelrod DE. Ecological Therapy for  
574 Cancer: Defining Tumors Using an Ecosystem Paradigm Suggests New  
575 Opportunities for Novel Cancer Treatments. *Transl Oncol*. 2008;1: 158–164.
- 576 7. Hanahan D, Weinberg RA. Hallmarks of Cancer: The Next Generation. *Cell*.  
577 2011;144: 646–674. doi:10.1016/j.cell.2011.02.013
- 578 8. Ruoslahti E. The Walter Herbert Lecture. Control of cell motility and tumour  
579 invasion by extracellular matrix interactions. *Br J Cancer*. 1992;66: 239–242.
- 580 9. Bauer AL, Jackson TL, Jiang Y. Topography of Extracellular Matrix Mediates  
581 Vascular Morphogenesis and Migration Speeds in Angiogenesis. *PLOS*  
582 *Comput Biol*. 2009;5: e1000445. doi:10.1371/journal.pcbi.1000445
- 583 10. Paulsson J, Micke P. Prognostic relevance of cancer-associated fibroblasts  
584 in human cancer. *Semin Cancer Biol*. 2014;25: 61–68.  
585 doi:10.1016/j.semcancer.2014.02.006
- 586 11. Ewald AJ, Huebner RJ, Palsdottir H, Lee JK, Perez MJ, Jorgens DM, et al.  
587 Mammary collective cell migration involves transient loss of epithelial  
588 features and individual cell migration within the epithelium. *J Cell Sci*.  
589 2012;125: 2638–2654. doi:10.1242/jcs.096875
- 590 12. Friedl P, Noble PB, Walton PA, Laird DW, Chauvin PJ, Tabah RJ, et al.  
591 Migration of coordinated cell clusters in mesenchymal and epithelial cancer  
592 explants in vitro. *Cancer Res*. 1995;55: 4557–4560.
- 593 13. Friedl P. Prespecification and plasticity: shifting mechanisms of cell  
594 migration. *Curr Opin Cell Biol*. 2004;16: 14–23.  
595 doi:10.1016/j.ceb.2003.11.001

- 596 14. Konen J, Summerbell E, Dwivedi B, Galior K, Hou Y, Rusnak L, et al. Image-  
597 guided genomics reveals a vascular mimicry during symbiotic collective  
598 cancer invasion. Unpublished. 2016;
- 599 15. Smale S. On the differential equations of species in competition. *J Math Biol.*  
600 1976;3: 5–7. doi:10.1007/BF00307854
- 601 16. Dhooge A, Govaerts W, Kuznetsov YA, Meijer HGE, Sautois B. New  
602 features of the software MatCont for bifurcation analysis of dynamical  
603 systems. *Math Comput Model Dyn Syst.* 2008;14: 147–175.  
604 doi:10.1080/13873950701742754
- 605 17. Seydel RU. *Practical Bifurcation and Stability Analysis.* Springer Science &  
606 Business Media; 2009.
- 607 18. Haney S, Reya T, Bazhenov M. Delayed onset of symptoms through  
608 feedback interference in chronic cancers. *Converg Sci Phys Oncol.* 2016;2:  
609 045002. doi:10.1088/2057-1739/2/4/045002
- 610 19. Sulzmaier FJ, Jean C, Schlaepfer DD. FAK in cancer: mechanistic findings  
611 and clinical applications. *Nat Rev Cancer.* 2014;14: 598–610.  
612 doi:10.1038/nrc3792
- 613 20. The Cancer Genome Atlas Network. Integrated genomic analyses of ovarian  
614 carcinoma. *Nature.* 2011;474: 609–615. doi:10.1038/nature10166
- 615 21. The Cancer Genome Atlas Network. Comprehensive molecular portraits of  
616 human breast tumours. *Nature.* 2012;490: 61–70. doi:10.1038/nature11412
- 617 22. Sood AK, Armaiz-Pena GN, Halder J, Nick AM, Stone RL, Hu W, et al.  
618 Adrenergic modulation of focal adhesion kinase protects human ovarian  
619 cancer cells from anoikis. *J Clin Invest.* 2010;120: 1515–1523.  
620 doi:10.1172/JCI40802
- 621 23. Ward KK, Tancioni I, Lawson C, Miller NLG, Jean C, Chen XL, et al.  
622 Inhibition of focal adhesion kinase (FAK) activity prevents anchorage-  
623 independent ovarian carcinoma cell growth and tumor progression. *Clin Exp*  
624 *Metastasis.* 2013;30: 579–594. doi:10.1007/s10585-012-9562-5
- 625 24. Tanjoni I, Walsh C, Uryu S, Tomar A, Nam J-O, Mielgo A, et al. PND-1186  
626 FAK inhibitor selectively promotes tumor cell apoptosis in three-dimensional  
627 environments. *Cancer Biol Ther.* 2010;9: 764–777.
- 628 25. Infante JR, Camidge DR, Mileskin LR, Chen EX, Hicks RJ, Rischin D, et al.  
629 Safety, pharmacokinetic, and pharmacodynamic phase I dose-escalation  
630 trial of PF-00562271, an inhibitor of focal adhesion kinase, in advanced solid  
631 tumors. *J Clin Oncol Off J Am Soc Clin Oncol.* 2012;30: 1527–1533.  
632 doi:10.1200/JCO.2011.38.9346

- 633 26. Roberts WG, Ung E, Whalen P, Cooper B, Hulford C, Autry C, et al.  
634 Antitumor activity and pharmacology of a selective focal adhesion kinase  
635 inhibitor, PF-562,271. *Cancer Res.* 2008;68: 1935–1944. doi:10.1158/0008-  
636 5472.CAN-07-5155
- 637 27. Kang Y, Hu W, Ivan C, Dalton HJ, Miyake T, Pecot CV, et al. Role of focal  
638 adhesion kinase in regulating YB-1-mediated paclitaxel resistance in ovarian  
639 cancer. *J Natl Cancer Inst.* 2013;105: 1485–1495. doi:10.1093/jnci/djt210
- 640 28. Gilbert-Ross M, Konen J, Koo J, Shupe J, Robinson BS, Wiles WG, et al.  
641 Targeting adhesion signaling in KRAS, LKB1 mutant lung adenocarcinoma.  
642 *JCI Insight.* 2017;2. doi:10.1172/jci.insight.90487
- 643 29. Lu C, Bonome T, Li Y, Kamat AA, Han LY, Schmandt R, et al. Gene  
644 alterations identified by expression profiling in tumor-associated endothelial  
645 cells from invasive ovarian carcinoma. *Cancer Res.* 2007;67: 1757–1768.  
646 doi:10.1158/0008-5472.CAN-06-3700
- 647 30. Jean C, Chen XL, Nam J-O, Tancioni I, Uryu S, Lawson C, et al. Inhibition of  
648 endothelial FAK activity prevents tumor metastasis by enhancing barrier  
649 function. *J Cell Biol.* 2014;204: 247–263. doi:10.1083/jcb.201307067
- 650 31. Sitohy B, Nagy JA, Dvorak HF. Anti-VEGF/VEGFR Therapy for Cancer:  
651 Reassessing the Target. *Cancer Res.* 2012;72: 1909–1914.  
652 doi:10.1158/0008-5472.CAN-11-3406
- 653 32. Folkman J. Tumor angiogenesis: therapeutic implications. *N Engl J Med.*  
654 1971;285: 1182–1186. doi:10.1056/NEJM197111182852108
- 655 33. Inai T, Mancuso M, Hashizume H, Baffert F, Haskell A, Baluk P, et al.  
656 Inhibition of vascular endothelial growth factor (VEGF) signaling in cancer  
657 causes loss of endothelial fenestrations, regression of tumor vessels, and  
658 appearance of basement membrane ghosts. *Am J Pathol.* 2004;165: 35–52.  
659 doi:10.1016/S0002-9440(10)63273-7
- 660 34. Kim ES, Serur A, Huang J, Manley CA, McCrudden KW, Frischer JS, et al.  
661 Potent VEGF blockade causes regression of coopted vessels in a model of  
662 neuroblastoma. *Proc Natl Acad Sci U S A.* 2002;99: 11399–11404.  
663 doi:10.1073/pnas.172398399
- 664 35. Hayes DF. Bevacizumab Treatment for Solid Tumors: Boon or Bust? *JAMA.*  
665 2011;305: 506–508. doi:10.1001/jama.2011.57
- 666 36. Hurwitz H, Fehrenbacher L, Novotny W, Cartwright T, Hainsworth J, Heim W,  
667 et al. Bevacizumab plus Irinotecan, Fluorouracil, and Leucovorin for  
668 Metastatic Colorectal Cancer. *N Engl J Med.* 2004;350: 2335–2342.  
669 doi:10.1056/NEJMoa032691

- 670 37. Basanta D, Anderson ARA. Exploiting ecological principles to better  
671 understand cancer progression and treatment. *Interface Focus*. 2013;3.  
672 doi:10.1098/rsfs.2013.0020
- 673 38. Hardin G. The Competitive Exclusion Principle. *Science*. 1960;131: 1292–  
674 1297. doi:10.1126/science.131.3409.1292
- 675 39. Huston M. A General Hypothesis of Species Diversity. *Am Nat*. 1979;113:  
676 81–101. doi:10.1086/283366
- 677 40. D H Boucher, S James, Keeler and KH. The Ecology of Mutualism. *Annu*  
678 *Rev Ecol Syst*. 1982;13: 315–347.  
679 doi:10.1146/annurev.es.13.110182.001531
- 680 41. Stachowicz JJ. Mutualism, Facilitation, and the Structure of Ecological  
681 Communities Positive interactions play a critical, but underappreciated, role  
682 in ecological communities by reducing physical or biotic stresses in existing  
683 habitats and by creating new habitats on which many species depend.  
684 *BioScience*. 2001;51: 235–246. doi:10.1641/0006-  
685 3568(2001)051[0235:MFATSO]2.0.CO;2
- 686 42. Bauer AL, Jackson TL, Jiang Y. A cell-based model exhibiting branching and  
687 anastomosis during tumor-induced angiogenesis. *Biophys J*. 2007;92:  
688 3105–3121. doi:10.1529/biophysj.106.101501
- 689 43. Schaller G, Meyer-Hermann M. Multicellular tumor spheroid in an off-lattice  
690 Voronoi-Delaunay cell model. *Phys Rev E*. 2005;71: 051910.  
691 doi:10.1103/PhysRevE.71.051910
- 692 44. Shirinifard A, Gens JS, Zaitlen BL, Popławski NJ, Swat M, Glazier JA. 3D  
693 Multi-Cell Simulation of Tumor Growth and Angiogenesis. *PLOS ONE*.  
694 2009;4: e7190. doi:10.1371/journal.pone.0007190
- 695 45. Rodriguez-Brenes IA, Komarova NL, Wodarz D. Evolutionary dynamics of  
696 feedback escape and the development of stem-cell–driven cancers. *Proc*  
697 *Natl Acad Sci*. 2011;108: 18983–18988.
- 698 46. Lowengrub JS, Frieboes HB, Jin F, Chuang Y-L, Li X, Macklin P, et al.  
699 Nonlinear modelling of cancer: bridging the gap between cells and tumours.  
700 *Nonlinearity*. 2010;23: R1. doi:10.1088/0951-7715/23/1/R01
- 701 47. Anderson ARA, Weaver AM, Cummings PT, Quaranta V. Tumor morphology  
702 and phenotypic evolution driven by selective pressure from the  
703 microenvironment. *Cell*. 2006;127: 905–915. doi:10.1016/j.cell.2006.09.042
- 704 48. Liu X, Johnson S, Liu S, Kanojia D, Yue W, Singh UP, et al. Nonlinear  
705 Growth Kinetics of Breast Cancer Stem Cells: Implications for Cancer Stem  
706 Cell Targeted Therapy. *Sci Rep*. 2013;3. Available:

707 [http://www.nature.com/srep/2013/130820/srep02473/full/srep02473.html?W](http://www.nature.com/srep/2013/130820/srep02473/full/srep02473.html?WT.ec_id=SREP-631-20130902)  
708 [T.ec\\_id=SREP-631-20130902](http://www.nature.com/srep/2013/130820/srep02473/full/srep02473.html?WT.ec_id=SREP-631-20130902)

709 49. Wodarz D, Komarova NL. Dynamics of cancer: mathematical foundations of  
710 oncology [Internet]. World Scientific; 2014. Available:  
711 [https://books.google.com/books?hl=en&lr=&id=90i7CgAAQBAJ&oi=fnd&pg=](https://books.google.com/books?hl=en&lr=&id=90i7CgAAQBAJ&oi=fnd&pg=PR7&dq=Dynamics+of+cancer+komarova&ots=OjSC2djQSP&sig=80eRRrskJ6xbQu0Cnk46GomlyDQ)  
712 [PR7&dq=Dynamics+of+cancer+komarova&ots=OjSC2djQSP&sig=80eRRrs](https://books.google.com/books?hl=en&lr=&id=90i7CgAAQBAJ&oi=fnd&pg=PR7&dq=Dynamics+of+cancer+komarova&ots=OjSC2djQSP&sig=80eRRrskJ6xbQu0Cnk46GomlyDQ)  
713 [kJ6xbQu0Cnk46GomlyDQ](https://books.google.com/books?hl=en&lr=&id=90i7CgAAQBAJ&oi=fnd&pg=PR7&dq=Dynamics+of+cancer+komarova&ots=OjSC2djQSP&sig=80eRRrskJ6xbQu0Cnk46GomlyDQ)

714

715



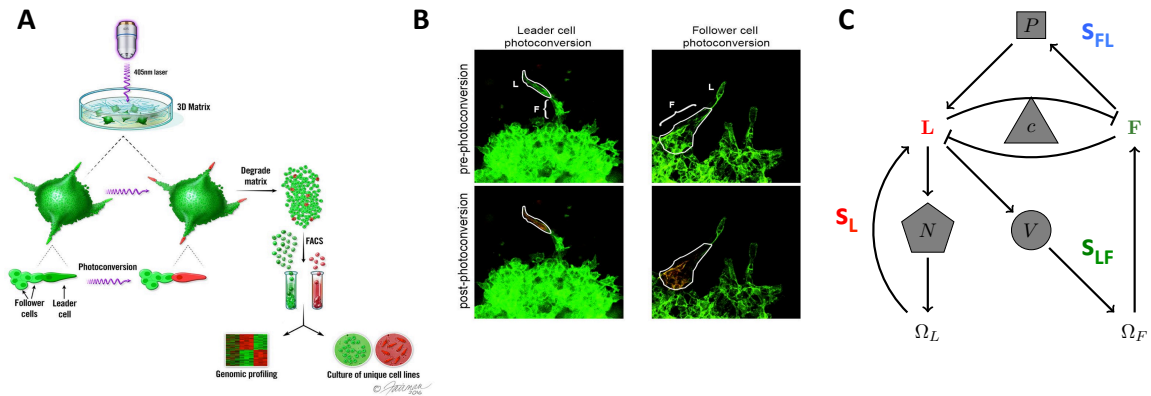

716

717

718

719

720

721

722

723

724

725

726

727

728

729

730

731

**Fig 1: Leader and Follower system.** A) Pictorial representation of the spatio-temporal genomic and cellular analysis (SaGA). Laser excitation of Dendra2 drives a change in fluorescence of user-specified cells. After degradation of cell matrix, fluorescence-based cell sorting is used to separate cells into leader and follower groups allowing for genetic analysis on specified groups. Printed with permission from Fairman Studios, LLC. This image is not included in the Creative Commons licence for the article. Adapted from Figure 1 in [14]. B) Photo-conversion examples using 3-D spheroids of H1299-Dendra2 cells. L= leader cell, F = follower cell. Adapted from Figure 1 in [14]. C) Stick representation of mathematical model of leader and follower cell interactions and invasion. Positive feedbacks are given by arrows, while negative feedbacks are given by flat-ended curves. The strength of leader only feedback ( $s_L$ ) is mediated by fibroNectin (N). The strength of leader to follower feedback ( $s_{LF}$ ) is mediated by VEGF (V). The strength of follower to leader feedback ( $s_{FL}$ ) is mediated by a proliferation signal secreted by followers (P). The strength of competition is given by c.



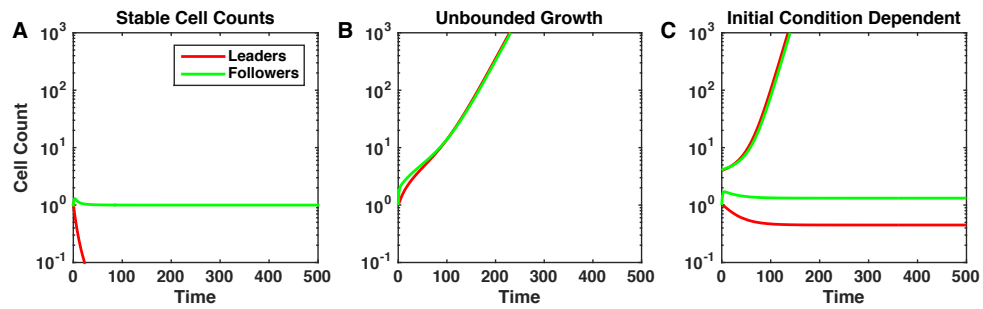

732

733

734

735

736

737

738

**Fig 2: Ecosystem dynamics depend strongly on the feedback strength.** Characteristic examples of the cancer cell population dynamics in the model for different strength of the competition between leader and followed cell populations,  $c$ , and leader population intrinsic feedback,  $s_L$ . Cancer cell populations may attain a stable size (A:  $s_L = 1.2, c = 0.6$ ), grow unboundedly (B:  $s_L = 1.2, c = 0.05$ ), or be dependent on the initial tumor size (C:  $s_L = 2, c = 0.375$ ).

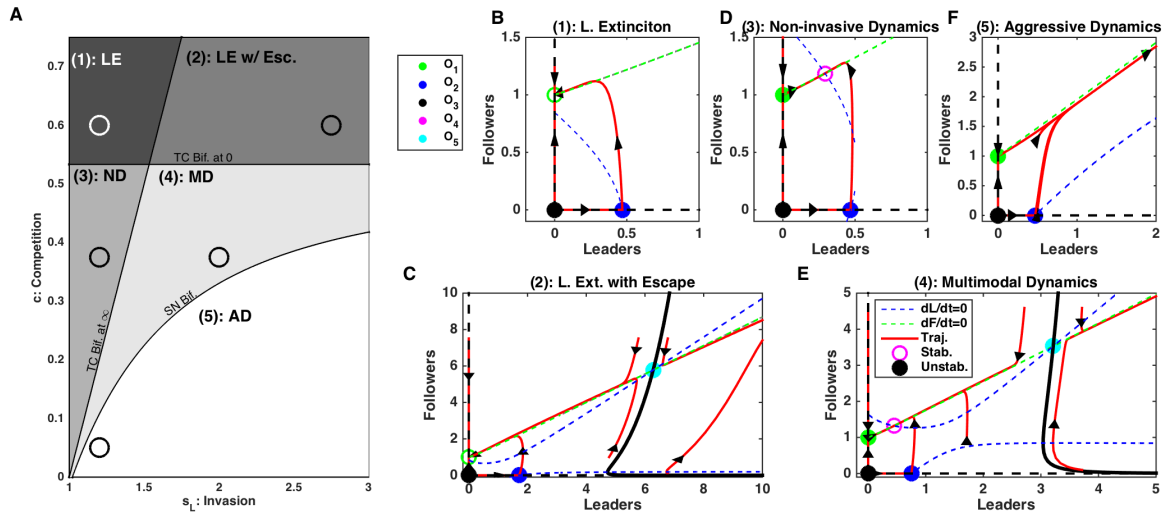

739

740

741

742

743

744

745

746

747

748

749

750

**Fig 3: Dynamics of the leader and follower ecosystem.** A) Bifurcation diagram sweeping leader population intrinsic feedback strengths,  $s_L$ , and competition strength,  $c$ . Abbreviations - LE: Leader Extinction, LE w/ Esc.: Leader Extinction with Escape, ND: Non-invasive Dynamics, MD: Multimodal Dynamics, AD: Aggressive Dynamics, TC Bif. at  $\infty$ : Transcritical Bifurcation at infinity (see Methods), TC Bif. at 0: Transcritical Bifurcation at zero (see Methods), SN Bif.: Saddle Node Bifurcation (see Methods). B-E) Phase diagrams for each regime identified in A). Dashed blue and green lines are null-clines for the leaders and followers, respectively. Red curves show the trajectories of the leader-follower system from different initial conditions, with arrows denoting tangent vectors at various points. Open circles denote stable equilibrium points, stars denote unstable equilibria. Specific  $s_L$  and  $c$  parameters used in panels B-E) are given by the circles in A).

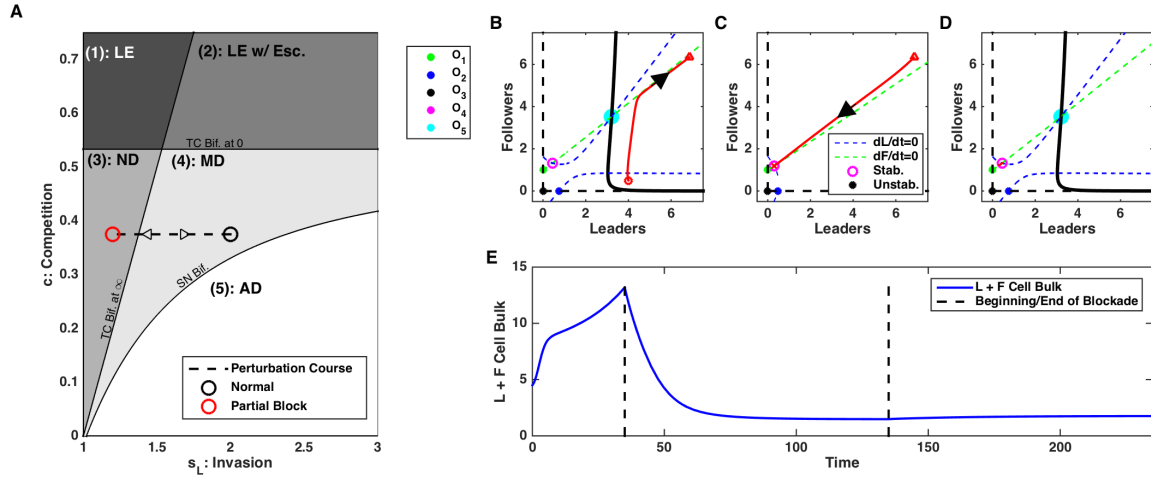

751

752

753

754

755

756

757

758

**Fig 4: Blocking leader cell population feedback in the Multi-modal Dynamics regime can lead to irreversible changes of the population dynamics.** A) Bifurcation diagram depicting the direction of the perturbation in the parameter space - increase in feedback,  $s_L$ . Black circuit – initial state; red circuit – perturbed state. B-D) Phase plots of dynamics before (B), during (C), and after (D) blockade of  $s_L$ . E) Time-course of cell bulk before, during, and after perturbation. Note irreversible change of the ecosystem dynamics.

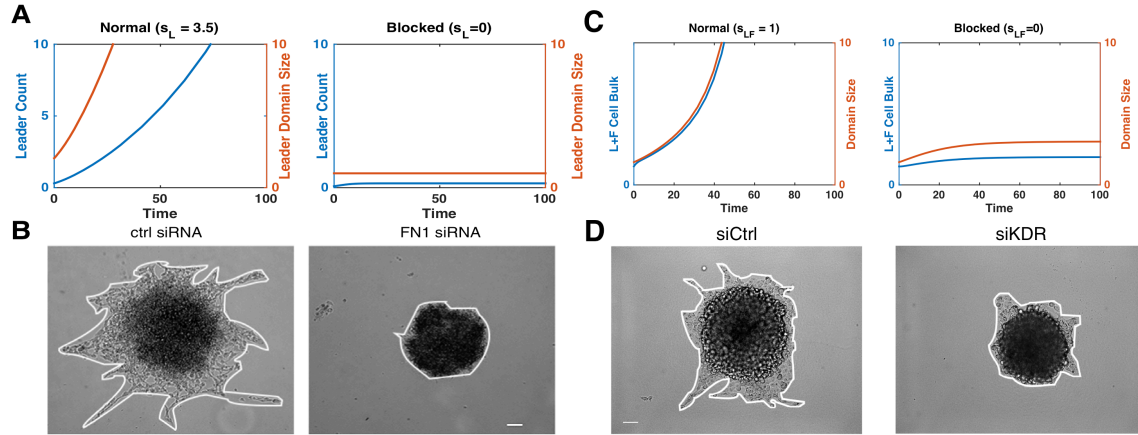

759

760

761

762

763

764

765

766

767

768

**Fig 5: Model reproduces in vitro experimental results.** A) In the model, leader cell count (blue) and domain size (red) are given in both normal (left) and leader population feedback,  $s_L$ , blocked (right) conditions. B) In cell culture, invasion of leader cells was significantly reduced during siRNA block of focal adhesion kinase (right), compare to control (left). Scale bar  $100\mu\text{m}$ . Reproduced from [14]. C) In the model, blocking leader to follower feedback,  $s_{LF}$ , limited invasive area and cell count. D) Impact on invasion of leader cell cultures during siRNA block of VEGFR2 (siKDR). Scale bar  $100\mu\text{m}$ . Invasive area was significantly reduced after VEGFR2 block ( $p < 0.0001$ ) (right), compare to control (left). Reproduced from [14].

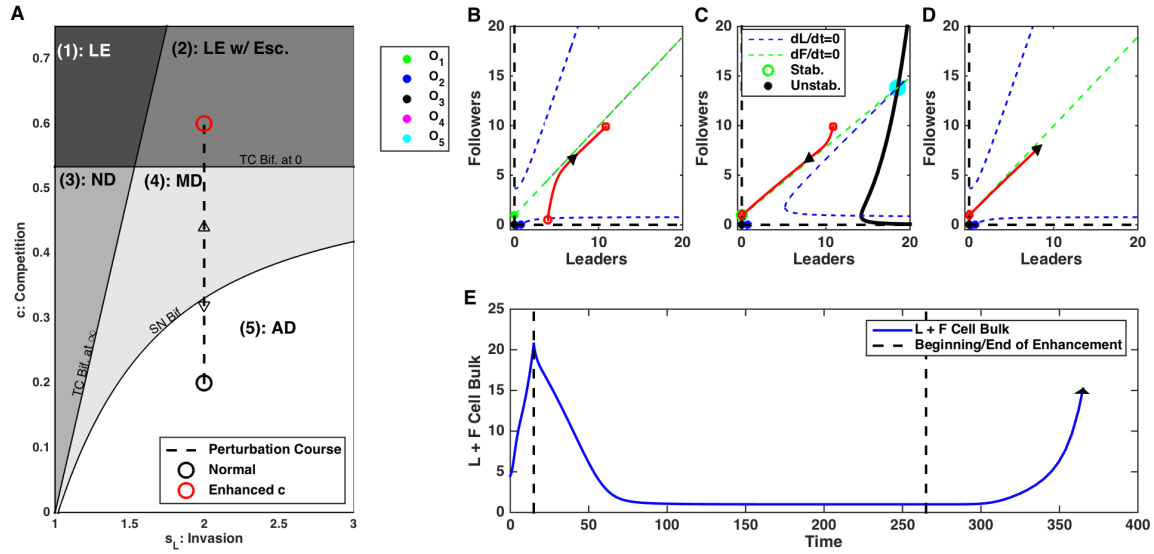

769

770

771

772

773

774

775

776

**Fig 6: Enhancing competition between leader and follower populations can drive transient extinction of leaders.** A) Bifurcation diagram depicting the direction of the perturbation - increase in competition,  $c$ . Black circuit – initial state; red circuit – perturbed state. B-D) Phase plots of dynamics before (B), during (C), and after (D) enhancement of competition. E) Time-course of cell count. Here, we assume total extinction of leaders occurs during treatment, i.e. at some point during treatment  $L=0$ . Note that ecosystem dynamics is reversed after perturbation is removed.

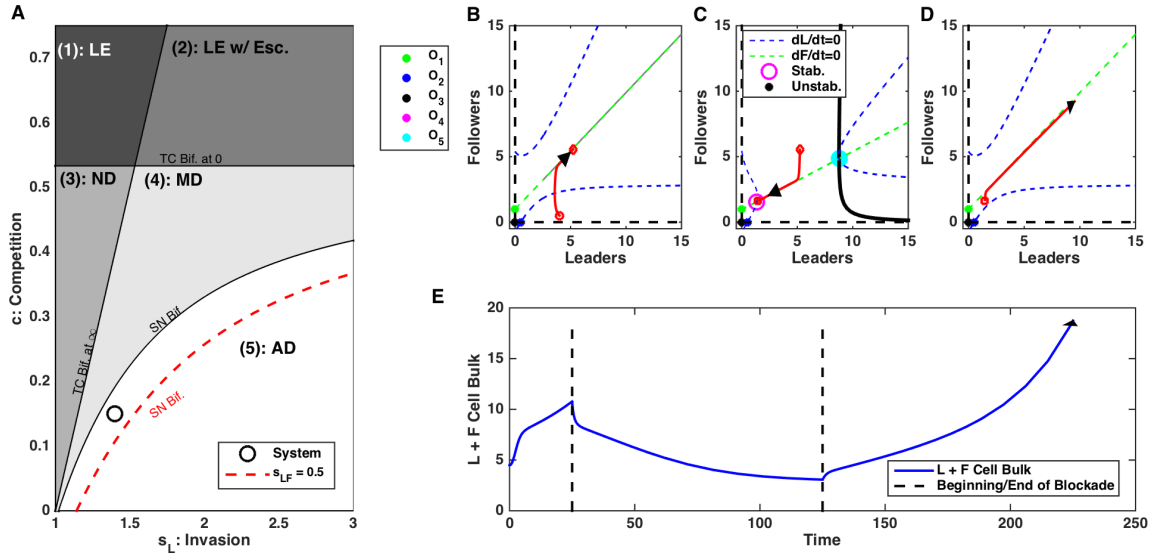

**Fig 7: Disrupting Leader to Follower feedback,  $s_{LF}$ , can trigger transient changes in the population dynamics.** A) Bifurcation diagram depicting the direction of the perturbation in parameter space. Perturbations in  $s_{LF}$  change the location of the saddle node bifurcation boundary. Black line – initial location of the bifurcation boundary; red line – perturbed location. B-D) Phase plots of dynamics before (B), during (C), and after (D) blockade of  $s_{LF}$ . E) Time-course of cell count. Note that ecosystem dynamics is reversed after perturbation is removed

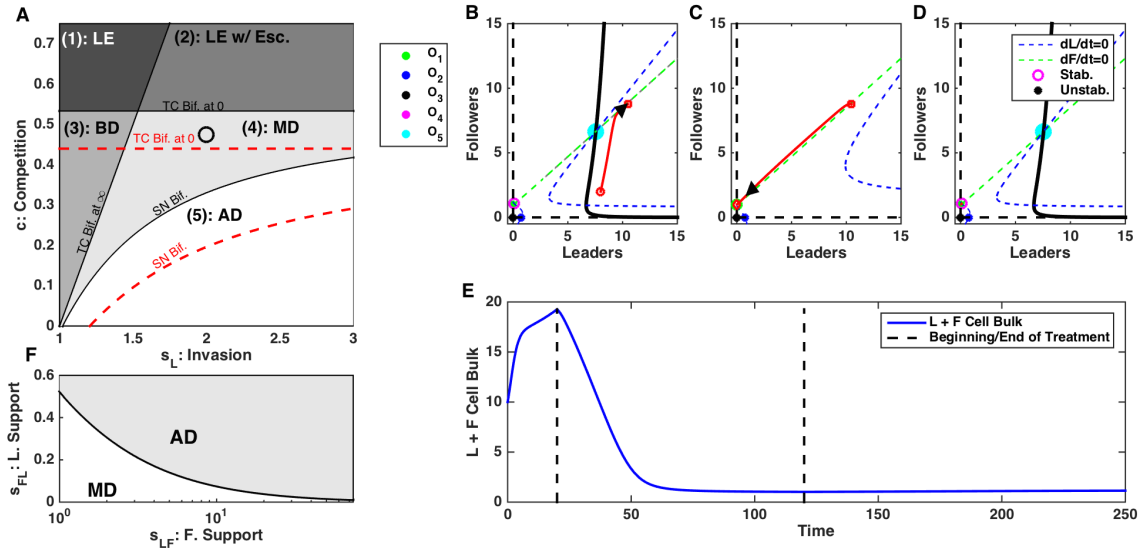

787

788

789

790

791

792

793

794

795

796

797

798

799

**Fig 8: Disrupting Follower to Leader feedback,  $s_{FL}$ , can have irreversible changes in dynamics leading to stabilization of cell count.** A) Bifurcation diagram depicting the direction of the perturbation in parameter space. Perturbations in  $s_{FL}$  change the location of the saddle node bifurcation and transcritical bifurcation at zero boundaries. Black lines – initial location of the bifurcation boundaries; red lines – perturbed location. B-D) Phase plots of dynamics before (B), during (C), and after (D) blockade of  $s_{FL}$ . E) Time-course of cell count. Note irreversible change of the ecosystem dynamics. F) Bifurcation diagram depicting the position of the saddle node bifurcation point as a function of  $s_{LF}$  and  $s_{FL}$ . AD: Aggressive Dynamics; MD: Multi-modal Dynamics. Here,  $s_L = 1.4$  and  $c = 0.2$ .
